# Supplementary material for: IL6 and BCL3 Expression Are Potential Biomarkers in Esophageal Squamous Cell Carcinoma
Source: Front Oncol. 2021 Aug 4;11:722417. doi: 10.3389/fonc.2021.722417 (PMC8371528; doi:10.3389/fonc.2021.722417)
Supplement: Supplementary file 2 [file Table_1.xlsx]

## Sheet: Sheet1
Supplementary Table 1: Associations between BCL3 and IL6 expression and clinical and tumor features in ESCC patients.
	IL6				BLC3
Characteristics	n	Total n*	Median (Min-Max)	p	n	Total n*	Median (Min-Max)	p
Gender
Female	9	37	8.4x10-3 (1.0x10-3 - 4.9x10-2)	0.9657	9	38	7.2x10-3 (2.8x10-3 - 2.1x10-2)	0.6442
Male	28		1.1x10-2 (6,9x10-7 - 3.9x10-1)		29		8.1x10-3 (1.4x10-3 - 10.0x10-2)
Age
< 59	18	37	9.8x10-3 (6.9x10-7 - 1.30x10-1)	0.4749	18	38	8.3x10-3 (1.4x10-3 - 10.0x10-2)	0.867
≥ 59	19		9.0x10-3 (8.8x10-4 - 3.9x10-1)		20		7.5x10-3 (1.8x10-3 - 2.5x10-2)
Drinking Status
Never	3	29	7.3x10-3 (8.8x10-4 - 1.2x10-2)	0.3558	3	29	7.6x10-3 (7.2x10-3 - 2.4x10-2)	0.4291
Ever	26		1.2x10-2 (1.5x10-4 - 3.9x10-1)		26		7.3x10-3 (1.4x10-3 - 2.5x10-2)
Tumor Differentiation
Moderately	29	35	8.4x10-3 (6.9x10-7 - 3.9x10-1)	0.9145	30	36	8.2x10-3 (1.8x10-3 - 10.0x10-2)	0.3332
Poorly	6		1.5x10-2 (6.2x10-4 - 4.9x10-2)		6		4.5x10-3 (1.4x10-3 - 2.4x10-2)
Tumor Stage
I-II	6	25	1.3x10-2 (6.9x10-7 - 3.9x10-1)	0.7935	6	25	1.4x10-2 (1.8x10-3 - 2.5x10-2)	0.3332
III-IV	19		9.0x10-3 (1.5x10-4 - 1.3x10-1)		19		8.1x10-3 (1.4x10-3 - 2.4x10-2)
Esophageal tumor central location
Proximal	5	36	3.8x10-3 (1.5x10-4 - 2.9x10-2)	0.4927	6	37	5.9x10-3 (1.8x10-3 - 8.3x10-3)	0.1313
Middle	27		8.4x10-3 (6.9x10-7 - 3.9x10-1)		27		8.5x10-3 (1.4x10-3 - 10.0x10-2)
Distal	4		2.6x10-2 (1.4x10-3 - 1.3x10-1)		4		1.6x10-2 (3.0x10-3 - 2.1x10-2)
*Numbers may vary due to missing data
